# Supplementary material for: Novel Cell and Tissue Acquisition System (CTAS): Microdissection of Live and Frozen Brain Tissues
Source: PubMed Central journal article supplement (PMC3404047; doi:10.1371/journal.pone.0041564), 2012-07-24
Supplement: pone.0041564.s002.pdf [file pone.0041564.s002.pdf]

# ***MATRIX*** **SCIENCE** Mascot Search Results

## Protein View

Match to: PP2AB\_MOUSE Score: 63 Expect: 0.012

Serine/threonine-protein phosphatase 2A catalytic subunit beta isoform OS=Mus musculus GN=Ppp2cb PE=1 SV=1

Nominal mass ( $M_r$ ): 36123; Calculated pI value: 5.21

NCBI BLAST search of [PP2AB\\_MOUSE](#) against nr

Unformatted [sequence string](#) for pasting into other applications

Taxonomy: [Mus musculus](#)

Fixed modifications: Carbamidomethyl (C)

Variable modifications: Oxidation (M)

Cleavage by Trypsin: cuts C-term side of KR unless next residue is P

Number of mass values searched: 55

Number of mass values matched: 8

Sequence Coverage: 36%

Matched peptides shown in **Bold Red**

```
1 MDDKAFTEKEL DQWVEQLNEC KQLNENQVRT LCEKAKEILT KESNVQEVRC
51 PVTVCGDVHG QFHDLMELEFR IGGKSPDTNY LFMGDYVDRG YYSVETVTL
101 VALKVRYPER ITILRGNHES RQITQVYGFY DECLRKYGNA NVWKYFTDLF
151 DYLPALTALVD GQIFCLHGGL SPSIDTLDHI RALDRLQEVV HEGPMC DLLW
201 SDPDDRGGWG ISPRGAGYTF GQDISETFNH ANGLTLVSRA HQLVMEGYNW
251 CHDRNVVTIF SAPNYCYRCG NQAAIMELDD TLKYSFLQFD PAPRRGEPHV
301 TRRTPDYFL
```

Show predicted peptides also

Sort Peptides By

Residue Number  Increasing Mass  Decreasing Mass

| Start - End | Observed  | Mr (expt) | Mr (calc) | Delta   | Miss | Sequence                                 |
|-------------|-----------|-----------|-----------|---------|------|------------------------------------------|
| 22 - 29     | 1000.5300 | 999.5227  | 999.5097  | 0.0130  | 0    | <b>K.QLNENQVR.T</b>                      |
| 75 - 89     | 1808.7482 | 1807.7409 | 1807.7723 | -0.0314 | 0    | <b>K.SPDTNYLFMGDYVDR.G</b> Oxidation (M) |
| 90 - 106    | 1910.9869 | 1909.9797 | 1910.0877 | -0.1080 | 1    | <b>R.GYYSVETVTLVVALKVR.Y</b>             |
| 122 - 135   | 1791.8034 | 1790.7962 | 1790.8298 | -0.0336 | 0    | <b>R.QITQVYGFYDECLR.K</b>                |
| 137 - 144   | 951.4625  | 950.4553  | 950.4610  | -0.0057 | 0    | <b>K.YGNANVWK.Y</b>                      |
| 215 - 239   | 2655.2424 | 2654.2351 | 2654.2725 | -0.0374 | 0    | <b>R.GAGYTFGQDISETFNHANGTLVSR.A</b>      |
| 255 - 268   | 1703.7961 | 1702.7888 | 1702.8137 | -0.0249 | 0    | <b>R.NVVTIFSAPNYCYR.C</b>                |
| 284 - 294   | 1340.6349 | 1339.6276 | 1339.6561 | -0.0285 | 0    | <b>K.YSFLQFDPAPR.R</b>                   |

# *MATRIX* SCIENCE Mascot Search Results

## Protein View

Match to: SPEE\_MOUSE Score: 69 Expect: 0.003  
Spermidine synthase OS=Mus musculus GN=Srm PE=2 SV=1

Nominal mass ( $M_r$ ): 34543; Calculated pI value: 5.31

NCBI BLAST search of SPEE\_MOUSE against nr  
Unformatted sequence string for pasting into other applications

Taxonomy: Mus musculus

Fixed modifications: Carbamidomethyl (C)

Variable modifications: Oxidation (M)

Cleavage by Trypsin: cuts C-term side of KR unless next residue is P

Number of mass values searched: 33

Number of mass values matched: 7

Sequence Coverage: 26%

Matched peptides shown in **Bold Red**

```

1  MEPGPDGPAA PGPAAIREGW FRETCSLWPG QALSLQVEQL LHHRRSRYQD
51 ILVFRSKTYG NVLVLDGVIQ CTERDEFSYQ EMIANLPLCS HPNPRKVLII
101 GGGDGGVLR VVKHPSVESV VQCEIDEDVI EVSKKFLPGM AVGFSSSKLT
151 LHVGDGFEFM KQNQDAFDVI ITDSSDPMGP AESLFKESYY QLMKTALKED
201 GILCCQGECQ WLHLDLIKEM RHFCKSLFPV VDYAYCSIPT YPSGQIGFML
251 CSKNPSTNFR EPVQQLTQAQ VEQMLKYIN SDMHRAAFVL PEFTRKALND
301 IS
  
```

Show predicted peptides also

Sort Peptides By

Residue Number  Increasing Mass  Decreasing Mass

| Start - End | Observed  | Mr(expt)  | Mr(calc)  | Delta   | Miss | Sequence                                 |               |
|-------------|-----------|-----------|-----------|---------|------|------------------------------------------|---------------|
| 1 - 22      | 2279.0984 | 2278.0911 | 2278.0953 | -0.0042 | 1    | <b>-.MEPGPDGPAA<b>PGPAAIREGW</b>FR.E</b> |               |
| 48 - 55     | 1053.5476 | 1052.5403 | 1052.5655 | -0.0252 | 0    | <b>R.YQDILVFR.S</b>                      |               |
| 58 - 74     | 1936.9450 | 1935.9378 | 1935.9724 | -0.0347 | 0    | <b>K.TYGNVLVLDG<b>VIQCTER</b>.D</b>      |               |
| 96 - 109    | 1353.7764 | 1352.7691 | 1352.8140 | -0.0449 | 1    | <b>R.KVLIIGGGDGGVLR.E</b>                |               |
| 97 - 109    | 1225.7058 | 1224.6985 | 1224.7190 | -0.0206 | 0    | <b>K.VLIIGGGDGGVLR.E</b>                 |               |
| 278 - 295   | 2233.0896 | 2232.0823 | 2232.0422 | 0.0401  | 1    | <b>K.YYNSDMHRAAFVL<b>PEFTR</b>.K</b>     | Oxidation (M) |
| 286 - 295   | 1150.6021 | 1149.5948 | 1149.6182 | -0.0234 | 0    | <b>R.AAFVL<b>PEFTR</b>.K</b>             |               |

# *MATRIX* SCIENCE Mascot Search Results

## Protein View

Match to: HS90B MOUSE Score: 71 Expect: 0.0021  
Heat shock protein HSP 90-beta OS=Mus musculus GN=Hsp90ab1 PE=1 SV=2

Nominal mass ( $M_r$ ): 83615; Calculated pI value: 4.97  
NCBI BLAST search of [HS90B MOUSE](#) against nr  
Unformatted [sequence string](#) for pasting into other applications

Taxonomy: [Mus musculus](#)

Fixed modifications: Carbamidomethyl (C)  
Variable modifications: Oxidation (M)  
Cleavage by Trypsin: cuts C-term side of KR unless next residue is P  
Number of mass values searched: 71  
Number of mass values matched: 12  
Sequence Coverage: 23%

Matched peptides shown in **Bold Red**

```
1 MPEEVHHGEE EVETFAFQAE IAQLMSLIIN TFYSNKEIFL RELISNASDA
51 LDKIRYESLT DPSKLDSGKE LKIDILPNPQ ERTLTLVDTG IGMTKADLIN
101 NLGTIAKSGT KAFMEALQAG ADISMIGQFG VGFYSAYLVA EKVVVITKHN
151 DDEQYAWESS AGGSFTVRAD HGEPIGRGTK VILHLKEDQT EYLEERRVKE
201 VVKKHSQFIG YPITLYLEKE REKEISDDEA EEEKGEKEEE DKEDEEKPKI
251 EDVGSDEEDD SGKDKKKKTK KIKEKYIDQE ELNKTKPIWT RNPDDITQEE
301 YGEFYKSLTN DWEDHLAVKH FSVEGQLEFR AFLFIPRRAP FDLFENK KKK
351 NNIKLYVRRV FIMDSCDELI PEYLNFI RGV V DSEDLPLNI SREMLQQSKI
401 LKVIRKNIVK KCLELFSELA EDKENYKKFY EAFSKNLKLG IHEDSTNRRR
451 LSELLRYHTS QSGDEMTSL S EYVSRMKETQ KSIYYITGES KEQVANPAFV
501 ERVRKRGFEV VYMTEPID EY CVQQLK EFDG KSLVSVTKEG LELPEDEEEK
551 KKMEESKAKF ENLCKLMKEI LDKKVEKVTI SNRLVSSPCC IVTSTYGWTA
601 NMERIMKAQA LRDNSTMGY M MAKKHLEINP DHPIVETLRQ KAEADKNDKA
651 VKDLVLLFE TALLSSGFSL EDPQTHSNRI YRMIKLGLGI DEDEVTAEEP
701 SAAVPDEIPP LEGDEDASRM EEVD
```

Show predicted peptides also

Sort Peptides By

Residue Number  Increasing Mass  Decreasing Mass

| Start - End | Observed  | Mr(expt)  | Mr(calc)  | Delta   | Miss | Sequence                               |
|-------------|-----------|-----------|-----------|---------|------|----------------------------------------|
| 73 - 82     | 1194.6427 | 1193.6354 | 1193.6404 | -0.0050 | 0    | K.IDILPNPQER.T                         |
| 149 - 168   | 2256.0970 | 2255.0898 | 2254.9516 | 0.1382  | 0    | K.HNDDEQYAWESSAGGSFTVR.A               |
| 205 - 219   | 1808.9492 | 1807.9419 | 1807.9509 | -0.0090 | 0    | K.HSQFIGYPITLYLEK.E                    |
| 320 - 330   | 1348.6543 | 1347.6471 | 1347.6572 | -0.0101 | 0    | K.HFSVEGQLEFR.A                        |
| 320 - 337   | 2193.0609 | 2192.0536 | 2192.1531 | -0.0995 | 1    | K.HFSVEGQLEFRAFLFIPR.R                 |
| 338 - 347   | 1236.6249 | 1235.6177 | 1235.6299 | -0.0122 | 1    | R.RAPFDLFENK.K                         |
| 360 - 378   | 2390.1382 | 2389.1309 | 2389.1334 | -0.0025 | 0    | R.VFIMDSCDELIPEYLNFI R.G Oxidation (M) |
| 379 - 392   | 1513.7753 | 1512.7680 | 1512.7784 | -0.0103 | 0    | R.GV DSEDLPLNISR.E                     |
| 613 - 623   | 1264.6385 | 1263.6312 | 1263.4934 | 0.1379  | 0    | R.DNSTMGYMAK.K Oxidation (M)           |
| 624 - 639   | 1911.0228 | 1910.0155 | 1910.0374 | -0.0218 | 1    | K.KHLEINPDHPIVETLR.Q                   |
| 625 - 639   | 1782.9488 | 1781.9416 | 1781.9424 | -0.0008 | 0    | K.HLEINPDHPIVETLR.Q                    |
| 686 - 719   | 3535.6461 | 3534.6388 | 3534.6373 | 0.0015  | 0    | K.LGLGIDEDEVTAEEPSAAVPDEIPPLEGDEDASR.M |

# *MATRIX* SCIENCE Mascot Search Results

## Protein View

Match to: CALB2\_MOUSE Score: 55 Expect: 0.081  
Calretinin OS=Mus musculus GN=Calb2 PE=1 SV=3

Nominal mass ( $M_r$ ): 31467; Calculated pI value: 4.94

NCBI BLAST search of [CALB2\\_MOUSE](#) against nr  
Unformatted [sequence string](#) for pasting into other applications

Taxonomy: [Mus musculus](#)

Fixed modifications: Carbamidomethyl (C)  
Variable modifications: Oxidation (M)  
Cleavage by Trypsin: cuts C-term side of KR unless next residue is P  
Number of mass values searched: 41  
Number of mass values matched: 7  
Sequence Coverage: 32%

Matched peptides shown in **Bold Red**

1 MAGPQQPPY LHLAELTASQ FLEIWKHFDA DNGYIEGKE **LENFFQELEK**  
51 ARKGGMMSK SDNFGEKMK FMOQYDKNSD **GKIEMAEFAQ ILPTEENFLL**  
101 **CFRQHVGSAA EFMEAWRKYD** TDRSGYIEAN ELKGFLSDLL **KKANRPYDEP**  
151 **KLQEYQTIL RMFDLNGDGK** LGLSEMSRL **PVQENFLLK** QGMKLTSEEF  
201 NAIFTFYDKD GSGYIDENEL DALLKDLYEK **NKKEMNIQQL TTYRKSVM**SL  
251 AEAGKLYRKD LEIVLCSEPP V

Show predicted peptides also

Sort Peptides By

Residue Number  Increasing Mass  Decreasing Mass

| Start - End | Observed  | Mr(expt)  | Mr(calc)  | Delta   | Miss | Sequence                                       |
|-------------|-----------|-----------|-----------|---------|------|------------------------------------------------|
| 40 - 50     | 1425.6827 | 1424.6755 | 1424.6823 | -0.0069 | 0    | <b>K.ELENFFQELEK.A</b>                         |
| 83 - 103    | 2553.2423 | 2552.2350 | 2552.2654 | -0.0304 | 0    | <b>K.IEMAEFAQILPTEENFLLCFR.Q</b> Oxidation (M) |
| 104 - 117   | 1650.8507 | 1649.8434 | 1649.7256 | 0.1178  | 0    | <b>R.QHVGSAAEFMEAWR.K</b> Oxidation (M)        |
| 134 - 142   | 1020.5924 | 1019.5851 | 1019.6015 | -0.0164 | 1    | <b>K.GFLSDLLKK.A</b>                           |
| 152 - 161   | 1264.6918 | 1263.6845 | 1263.6823 | 0.0022  | 0    | <b>K.LQEYQTILR.M</b>                           |
| 179 - 189   | 1313.7619 | 1312.7546 | 1312.7755 | -0.0208 | 0    | <b>R.LLPVQENFLLK.F</b>                         |
| 234 - 244   | 1412.6853 | 1411.6781 | 1411.6765 | 0.0015  | 0    | <b>K.EMNIQQLTTYR.K</b> Oxidation (M)           |
